# Supplementary material for: Cathepsin D overexpression in the nervous system rescues lethality and Aβ42 accumulation of cathepsin D systemic knockout in vivo
Source: PubMed Central journal article supplement — Acta Pharm Sin B. 2023 Jul 20;13(10):4172–84. doi: 10.1016/j.apsb.2023.07.015 (PMC10547960; doi:10.1016/j.apsb.2023.07.015), 2023-07-20
Supplement: mmc1.pdf [file mmc1.pdf]

**Supporting Information for**

**Original article**

**Cathepsin D overexpression in the nervous system rescues lethality and A $\beta$ 42 accumulation of cathepsin D systemic knockout *in vivo***

**Xiaosen Ouyang<sup>a</sup>, Willayat Y. Wani<sup>a</sup>, Gloria A. Benavides<sup>a</sup>, Matthew J. Redmann<sup>a</sup>, Hai Vo<sup>a</sup>, Thomas van Groen<sup>b</sup>, Victor M. Darley-USmar<sup>a</sup>, Jianhua Zhang<sup>a,c,\*</sup>**

<sup>a</sup>*Department of Pathology, University of Alabama at Birmingham, Birmingham, AL 35294, USA*

<sup>b</sup>*Department of Cell, Developmental and Integrative Biology, University of Alabama at Birmingham, Birmingham, AL 35294, USA*

<sup>c</sup>*Birmingham VA medical Center, University of Alabama at Birmingham, Birmingham, AL 35294, USA*

Received 11 April 2023; received in revised form 26 May 2023; accepted 13 June 2023

\*Corresponding author. Tel.: +86 205 996 5153; fax: +86 205 934 7447.

E-mail address: [jianhuazhang@uabmc.edu](mailto:jianhuazhang@uabmc.edu) (Jianhua Zhang).

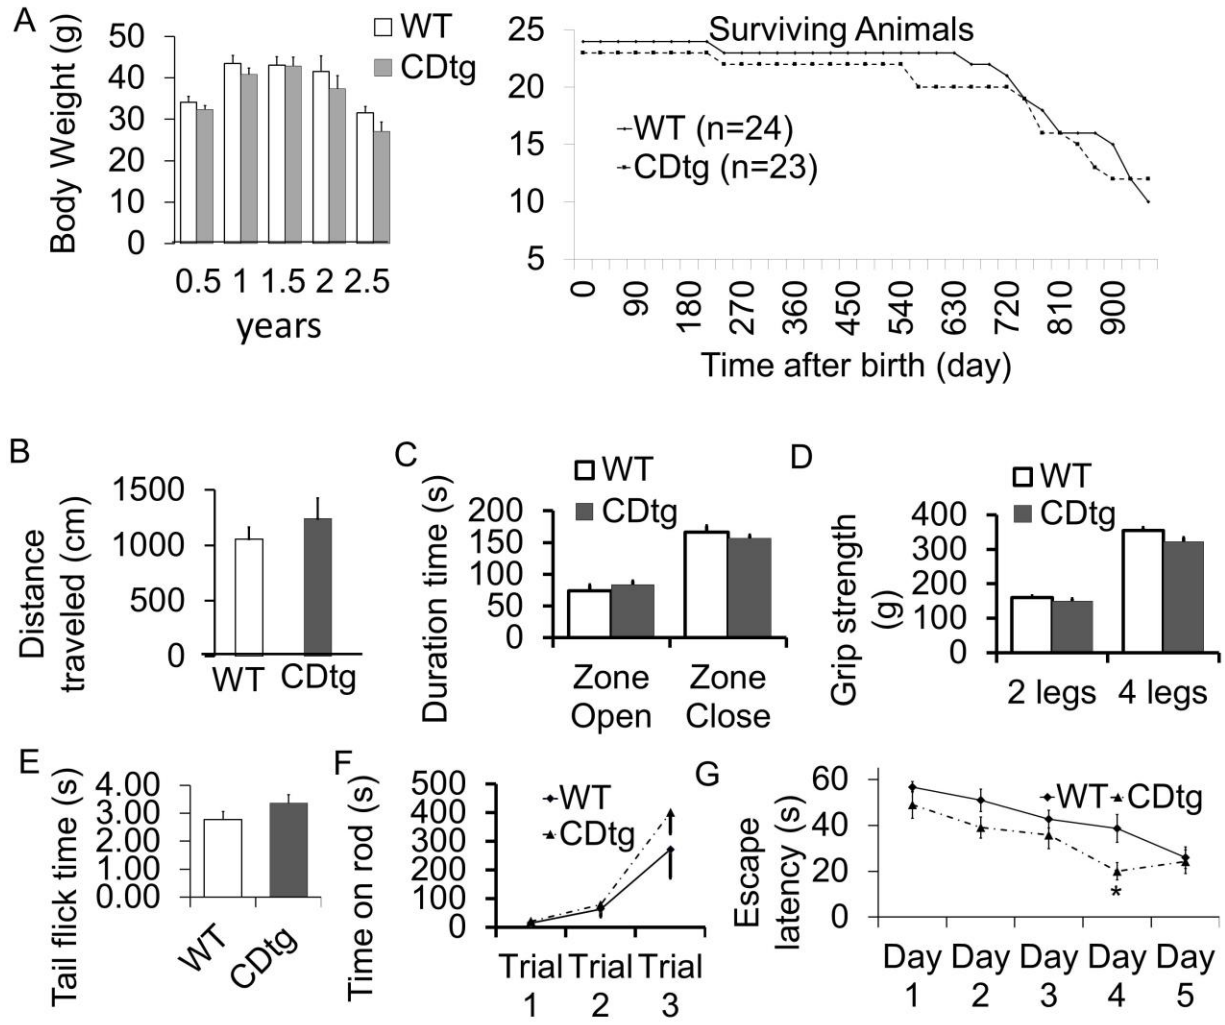

**Figure S1 Normal body weight, lifespan, and behaviors of CDtg mice.** **A)** The body weight of CDtg mice are indistinguishable from wildtype mice ( $n=8-24$  male). Both wildtype and CDtg mice start to die of natural causes at 22 months of age and median lifespan of 30 months of age (male). At one year of age ( $n=6$  each genotype): **B)** Performance in open field was examined and the total distance traveled within examination windows was indistinguishable for the CDtg mice compared to the wildtype mice; **C)** Performance in zero maze was examined and CDtg mice spent similar time in open and close zone as wildtype mice; **D)** Grip strength was similar between Cdtg and wildtype mice; **E)** Tail flick time was similar between Cdtg and wildtype mice; **F)** CDtg mice exhibit modest increase of time on rod compared to wildtype mice on the accelerating rotarod ( $P=0.046$ ); and **G)** Performance in Morris water maze were also similar between CDtg and control mice, except on Day 4. Data=mean $\pm$ SEM. Behavioral data were analyzed using two-way repeated

measures analysis of variance (RM ANOVA). Animal genotype is a grouping factor while the repeated observation within animal is the repeated measure. No differences in Water maze and rotarod performance were found at 1.5 years of age ( $n=8-9$  male each genotype) and in open field and zero maze tests at 2 years of age ( $n=6-7$  male each genotype) (data not shown).

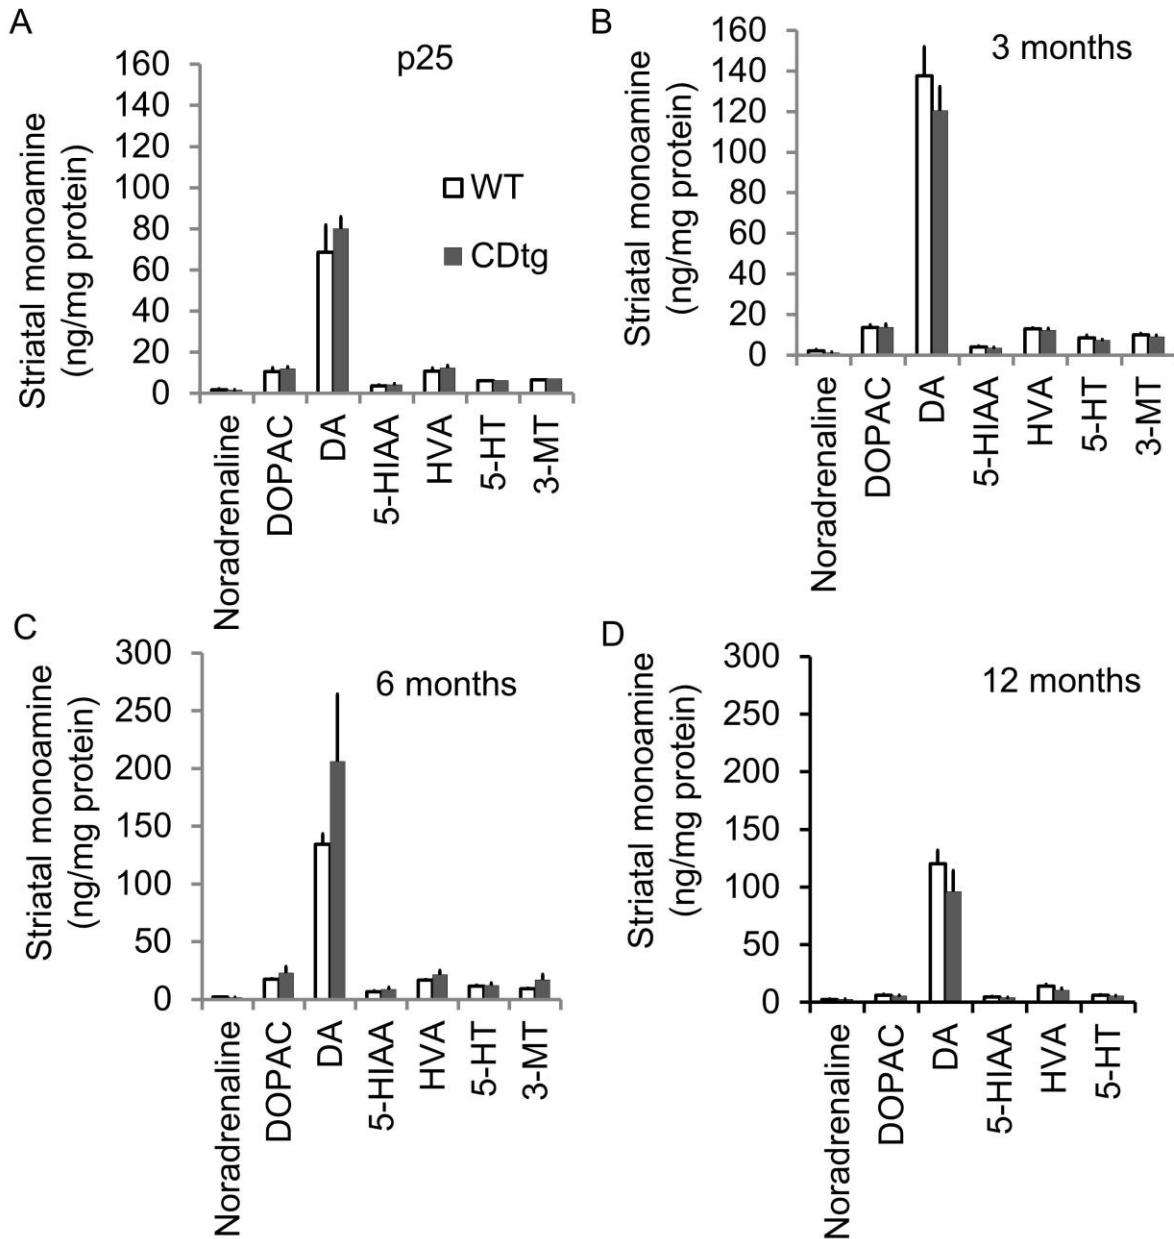

**Figure S2 Normal striatal monoamine levels in CDtg mice.** Normal striatal monoamine levels in CDtg mice as assessed by HPLC analyses at **A)** postnatal 25 (P25) ( $n=7$ ), **B)** 3 mo of age ( $n=3$ ), **C)** 6 mo of age ( $n=7$ ), and **D)** 1 year of age ( $n=3$ ). Data = mean  $\pm$  SEM.

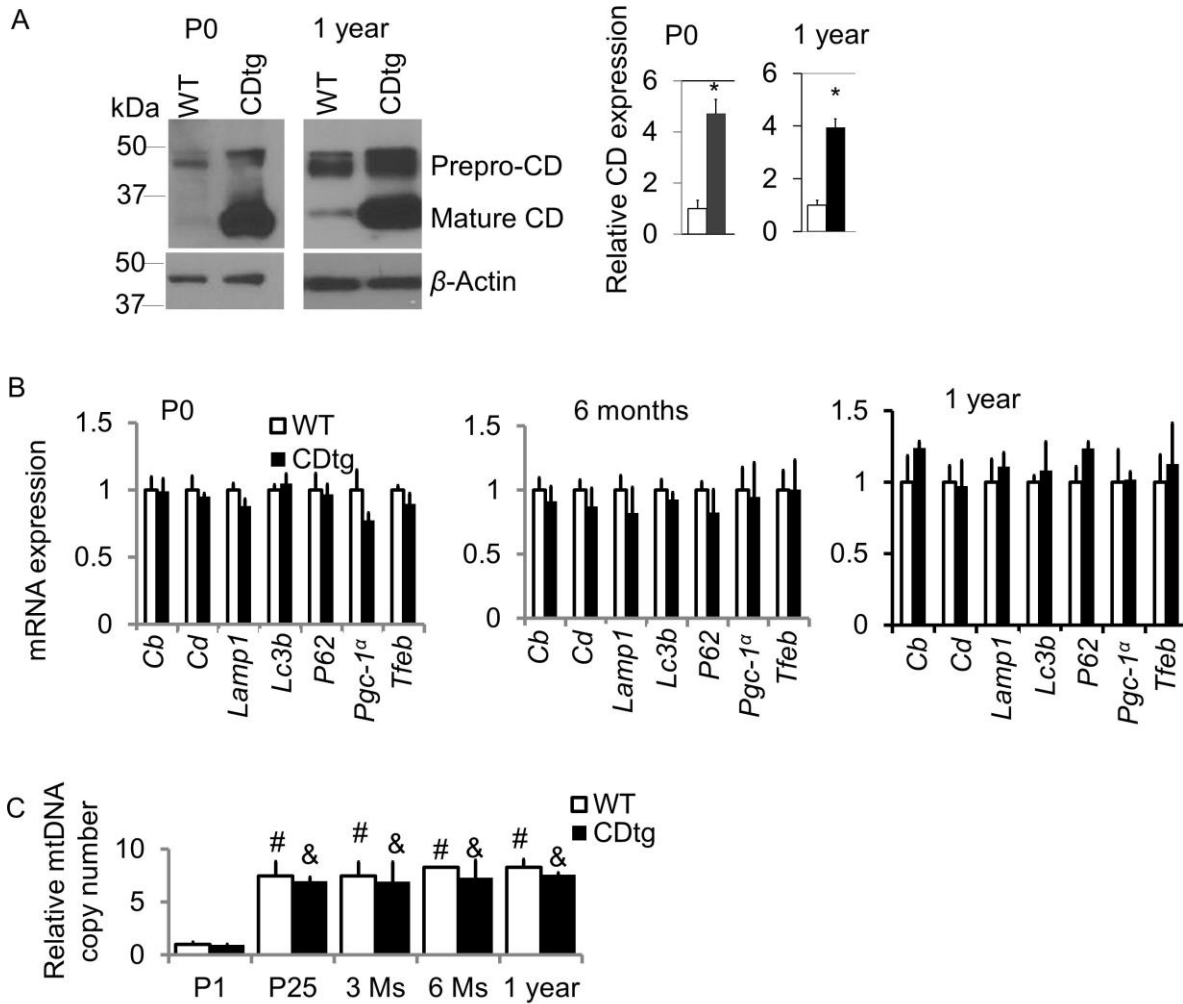

**Figure S3 Normal levels of autophagy related mRNAs and mitochondrial copy numbers in CDtg mice.** **A)** Western blot analysis of cortical lysates from WT and CDtg mice (P0 and 1 year old) for Ctsd.  $\beta$ -Actin was used as a protein loading control. Quantification of the band intensity was done by image J software 1.48e NIH, USA. **B)** Real-time RT-PCR analyses of indicated mRNA, with  $\beta$ -actin as a control. Similar mRNA expression of *Cb*, endogenous mouse *Ctsd*, *Lamp1*, *Map1-1c3*, *Sqstm1/P62*, *Ppagc1a* and *Tfeb* in CDtg mice compared to WT mice ( $n=3$  each genotype at P0, 6 months and 1 year of age). **C)** mtDNA copy number was measured by real-time PCR normalized to nuclear DNA. Similar mtDNA copy number at P1, P25, 3 months, 6 months,

and 1 year of age in CDtg mice compared to WT mice. Data=mean±SEM ( $n = 4$ ) normalized to WT. Comparison between two groups was performed using unpaired Student  $t$ -test. \* $P < 0.05$  compared to WT, # $P < 0.05$  compared to WT P1, & $P < 0.05$  compared to CDtg P1.

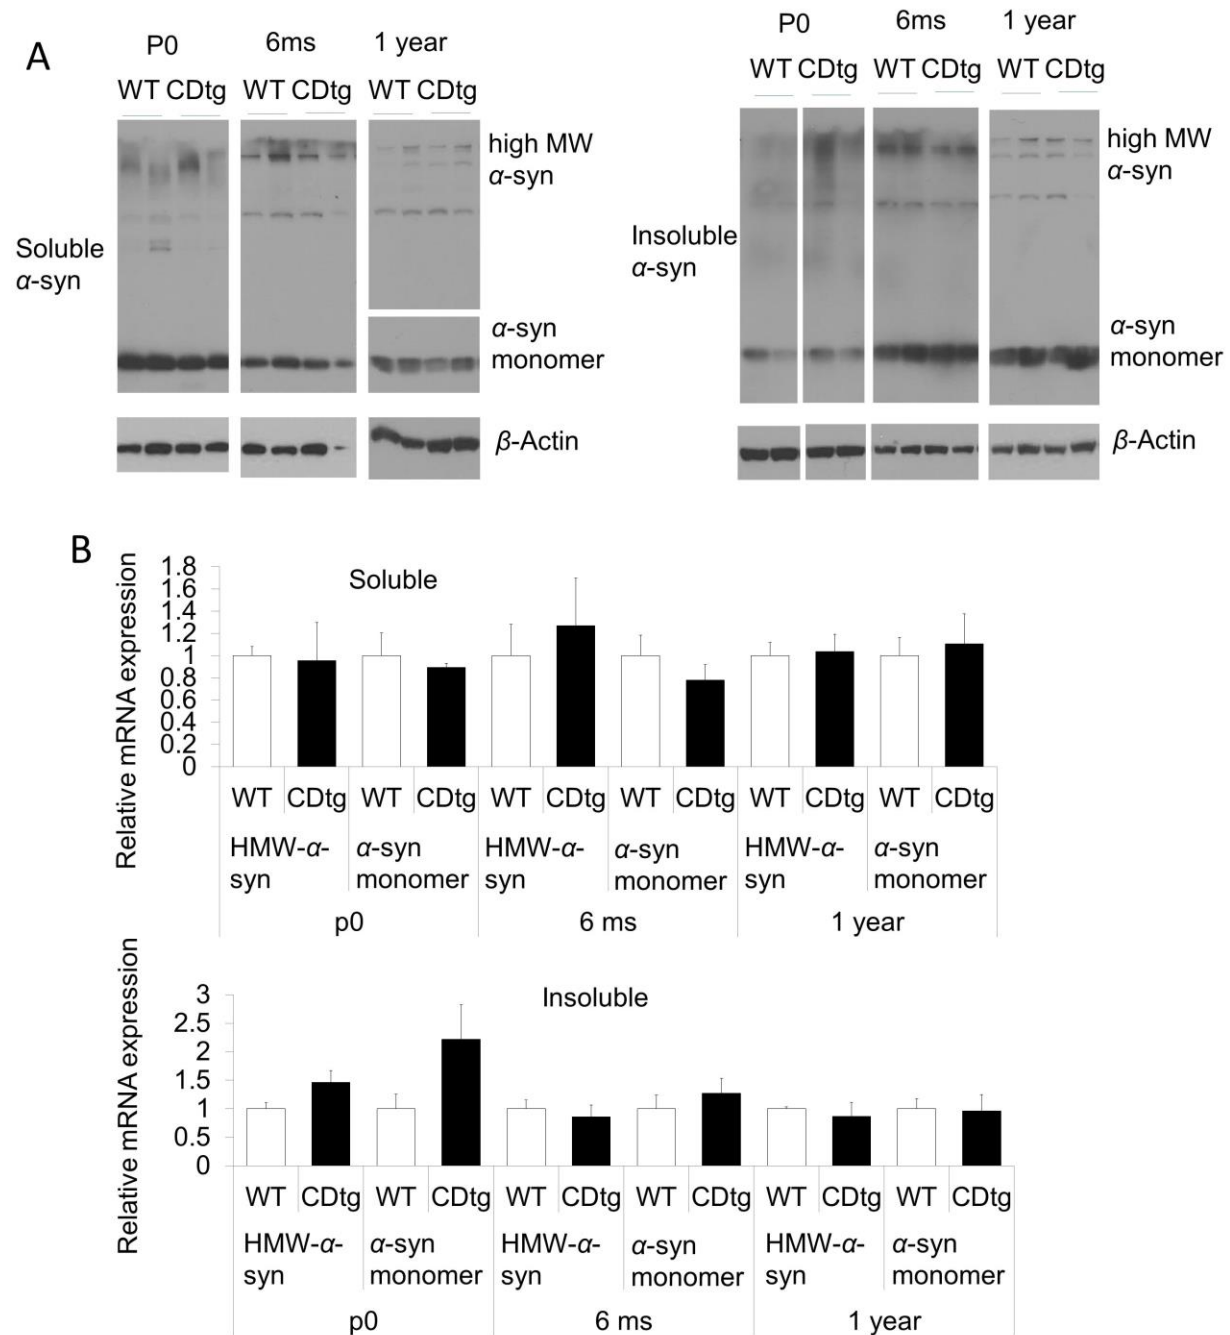

**Figure S4 Similar endogenous  $\alpha$ -synuclein levels in CDtg and wildtype (WT) mouse cortex.**

**A)** Western blot analyses of 1% Triton-X100 soluble and insoluble (pellet dissolved in sample

buffer containing 2% SDS)  $\alpha$ -synuclein with protein extracts from cortex of CDtg and WT mouse brains. **B)** Quantification of immunoreactive bands for both monomer and higher molecular weight species,  $n=3$  mice each genotype.  $\beta$ -actin was used as a protein loading control. Quantification of the band intensity was done by image J software 1.48e NIH, USA. Data=mean $\pm$ SEM normalized to WT. Comparison between two groups was performed using unpaired Student *t*-test.

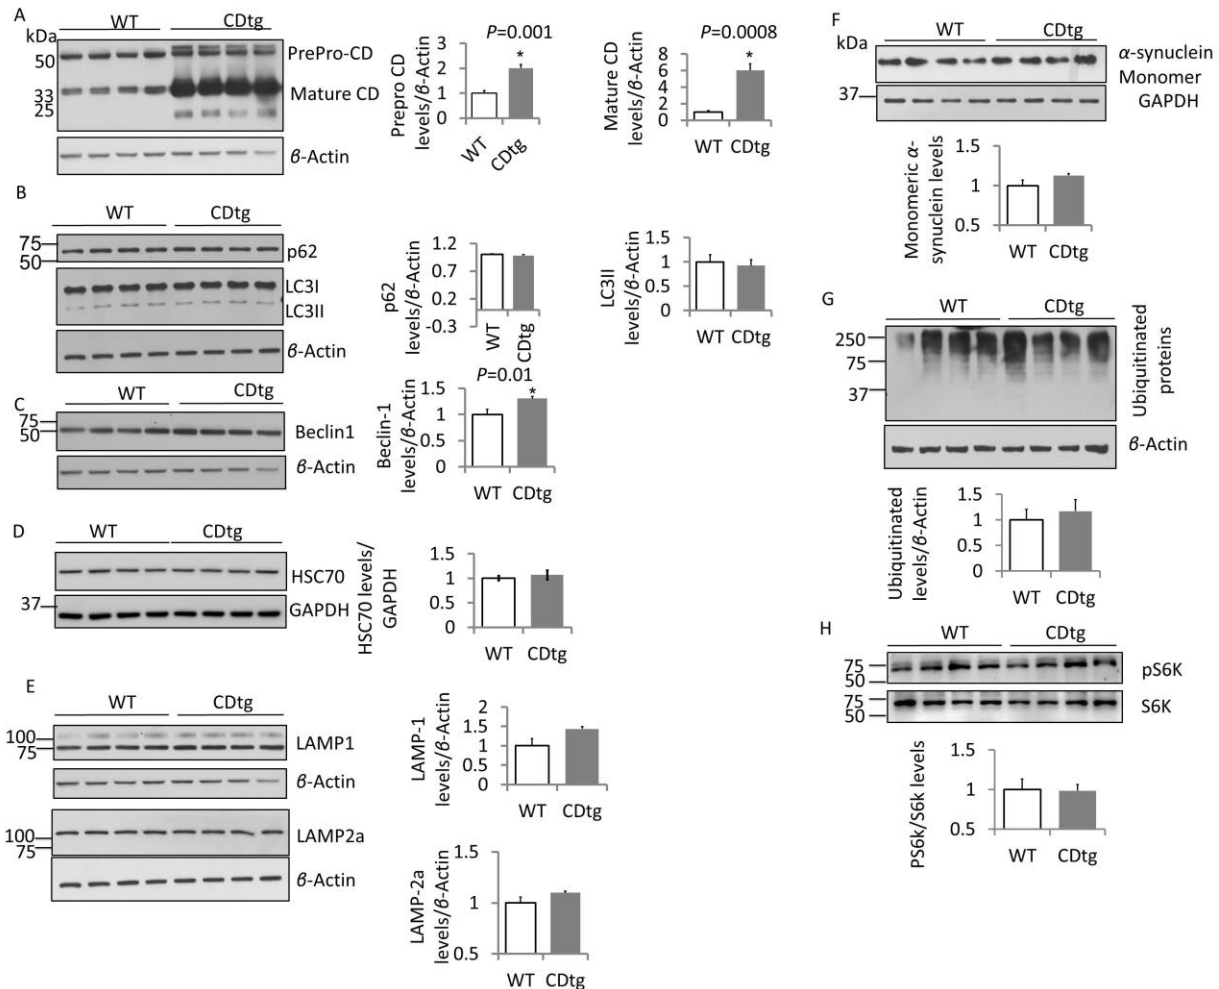

**Figure S5 Western blot analysis of cortical lysates from WT and CDtg (2 year old) for indicated proteins.**  $\beta$ -Actin or GAPDH was used as a protein loading control. Quantification of the band intensity was done by image J software 1.48e NIH, USA. Data=mean $\pm$ SEM ( $n = 4$ ) normalized to WT. Comparison between two groups was performed using unpaired Student *t*-test. \* $P < 0.05$  was considered statistically significant.

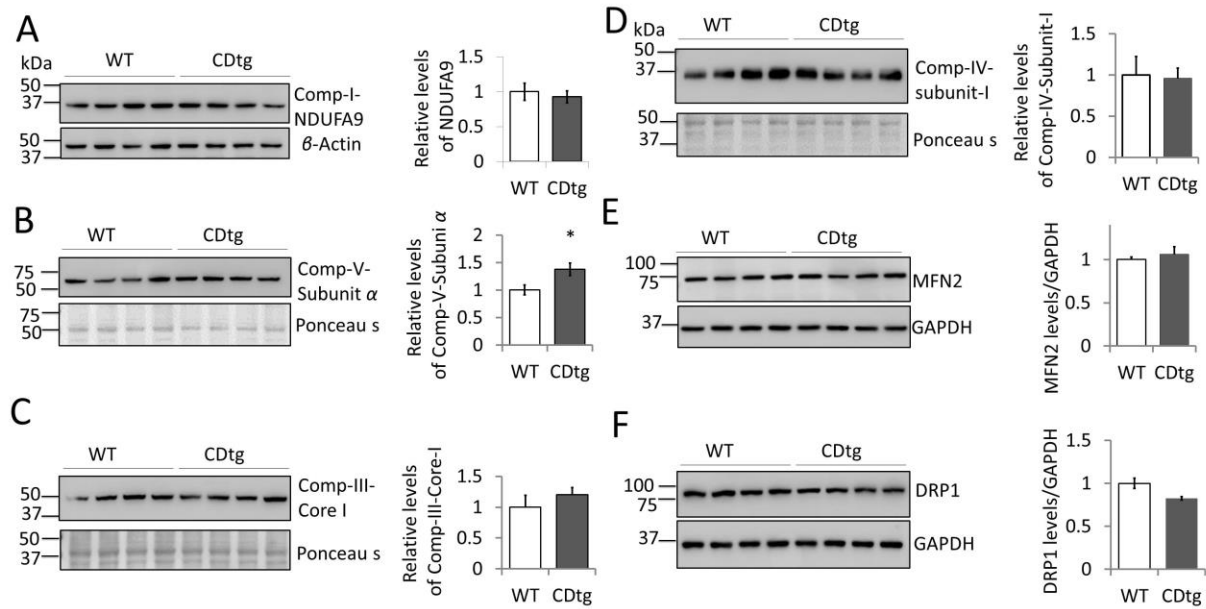

**Figure S6 Western blot analysis of cortical lysates from WT and CDtg (2 year old) for indicated proteins.**  $\beta$ -Actin or GAPDH was used as a protein loading control. Quantification of the band intensity was done by image J software 1.48e NIH, USA. Data=mean $\pm$ SEM ( $n = 4$ ) normalized to WT. Comparison between two groups was performed using unpaired Student  $t$ -test. \* $P < 0.05$  compared to WT.

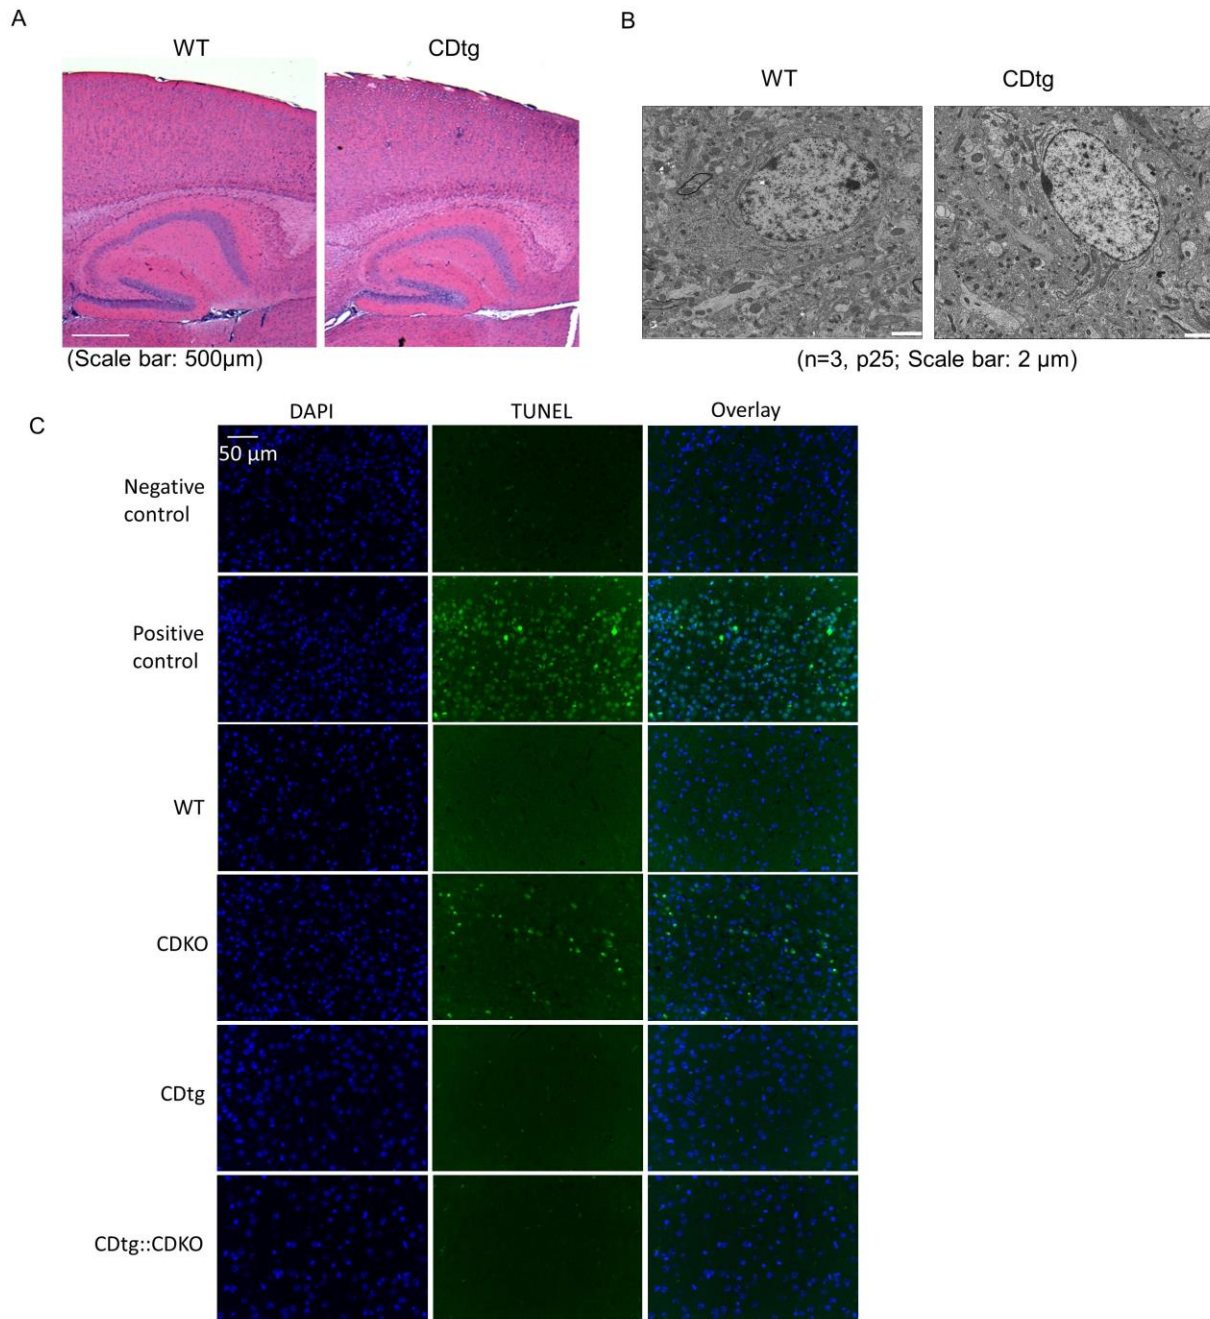

**Figure S7 Normal brain structure without overt apoptosis in CDtg mice.** **A)** Normal appearance of cortical regions of CDtg mice compared to wildtype (WT) mice by H&E staining (Scale bar=100  $\mu$ m). **B)** Normal cortical neuron appearance in CDtg mice at P25 by electron microscopy (Scale bar=2  $\mu$ m). **C)** TUNEL staining show TUNEL positive cells in the cortex of CDKO mice but not in WT, CDtg, or CDtg::CDKO mice ( $n=3$  mice each group). DNase treated sections were used as positive control, no TdT treatment was used as negative control.



A

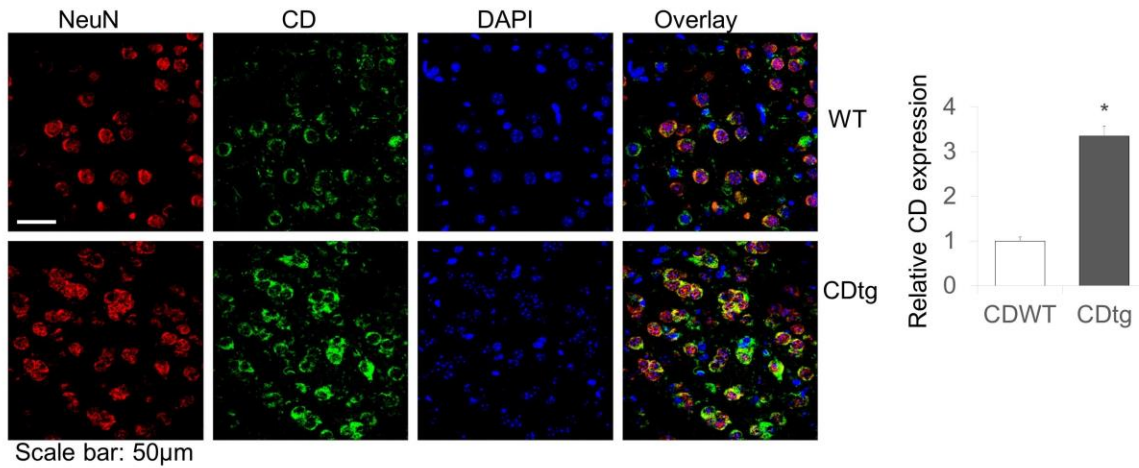

B

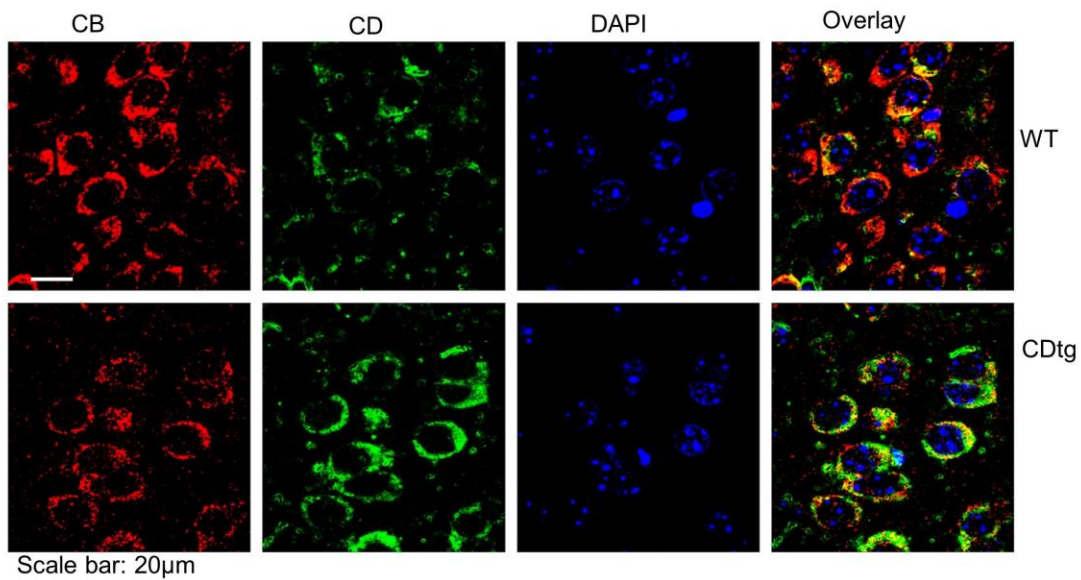

**Figure S8 CTSD expression in lysosomes in neurons in CDtg mice.** A) By co-immunohistochemistry, we found that *Ctsd* (Green) is expressed in cells with positive NeuN (Red) immunoreactivity in both wildtype (WT) and CDtg mouse cortex. Scale bar=50 µm. Quantification of immunoreactivity in NeuN positive cells shows that CTSD levels are increase by slightly over 3× fold in neurons. B) *Ctsd* (Green) colocalizes with *Ctsb* (Red) in both wildtype (WT) and CDtg mouse cortex by co-immunohistochemistry. Scale bar=20 µm. *n*=3 animals per genotype. P25 brains were used.

A

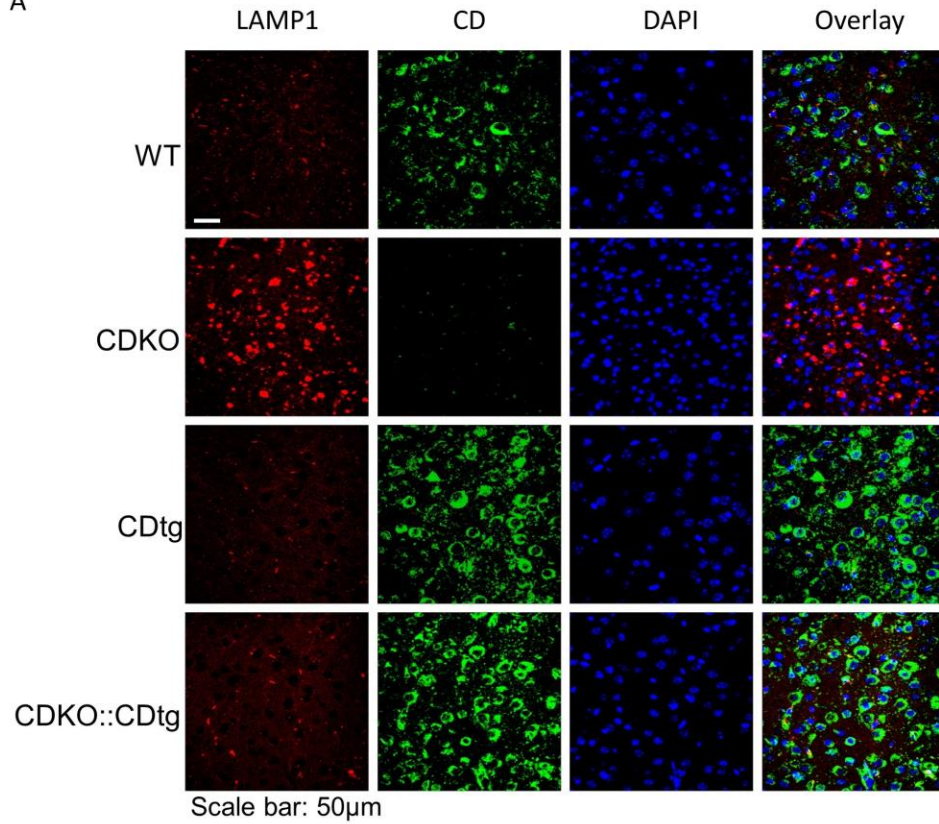

B

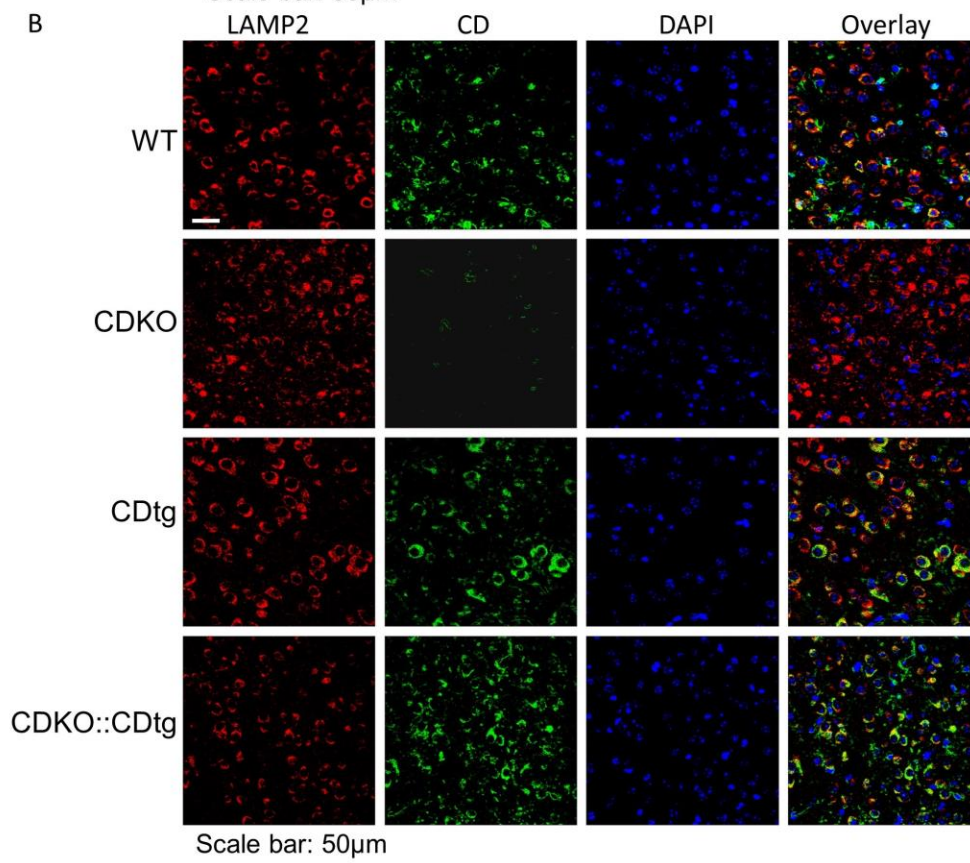

**Figure S9 CTSD overexpression rescued the accumulation of LAMP1 in CDKO mice without changing LAMP2 levels.** **A)** Co-immunohistochemistry of CTSD (Green) with LAMP 1 (Red) in mouse cortex (Scale bar=50  $\mu$ m). **B).** Co-immunohistochemistry of CTSD (Green) with LAMP2 (Red) in mouse cortex (Scale bar=50 $\mu$ m).  $n=3$  animals per genotype. P25 brains were used.

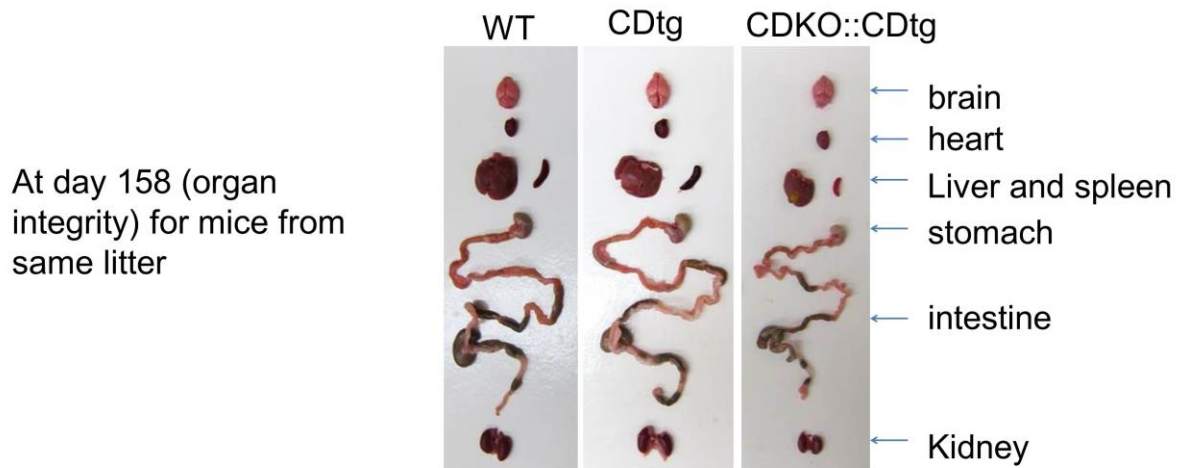

**Figure S10 CDtg::CDKO mice succumb to intestinal necrosis at around P150.** Tissue appearance is shown from representative dissections of mice of the 3 indicated genotypes. Tissues in CDKO::CDtg mice are smaller than wildtype or CDtg mice at this age.  $n>3$ .
